# Supplementary material for: Differences in Mechanical, Electrical and Calcium Transient Performance of the Isolated Right Atrial and Ventricular Myocardium of Guinea Pigs at Different Preloads (Lengths)
Source: MDPI journal article supplement (doi:10.3390/ijms242115524), 2023-10-24
Supplement: s1 [file s1]

**Table S1. TTP RV (Figure 4A)**

| ANOVA Friedman results                                                                                                                                           |                                            |                       |          |            |        |
|------------------------------------------------------------------------------------------------------------------------------------------------------------------|--------------------------------------------|-----------------------|----------|------------|--------|
| factor                                                                                                                                                           | Kendall's<br>coefficient of<br>concordance | degrees of<br>freedom | $\chi^2$ | $p$ -value |        |
| Length, $L/L_{max}$                                                                                                                                              | 0.8215                                     | 4                     | 36.1461  | 2.7E-07    |        |
| $p$ -values - results of Siegel and Castellan's all-pairs comparisons post-hoc test with closed method based on Simes tests (non-negative) to adjust $p$ -values |                                            |                       |          |            |        |
| Length, $L/L_{max}$                                                                                                                                              | 0.8                                        | 0.85                  | 0.9      | 0.95       | 1.0    |
| 0.8                                                                                                                                                              | 1                                          | 1.5E-1                | 3.8E-3   | 3.1E-5     | 2.1E-6 |
| 0.85                                                                                                                                                             | 1.5E-1                                     | 1                     | 1.5E-1   | 7.5E-3     | 1.2E-3 |
| 0.9                                                                                                                                                              | 3.8E-3                                     | 1.5E-1                | 1        | 2.0E-1     | 7.2E-2 |
| 0.95                                                                                                                                                             | 3.1E-5                                     | 7.5E-3                | 2.0E-1   | 1          | 5.0E-1 |
| 1.0                                                                                                                                                              | 2.1E-6                                     | 1.2E-3                | 7.2E-2   | 5.0E-1     | 1      |

*p* < 0.05 are highlighted in red.

**Table S2. TTP RA (Figure 4A)**

| ANOVA Friedman results                                                                                                                                           |                                      |                    |          |            |         |
|------------------------------------------------------------------------------------------------------------------------------------------------------------------|--------------------------------------|--------------------|----------|------------|---------|
| factor                                                                                                                                                           | Kendall's coefficient of concordance | degrees of freedom | $\chi^2$ | $p$ -value |         |
| Length, $L/L_{max}$                                                                                                                                              | 0.9003                               | 4                  | 21.6068  | 2.4E-04    |         |
| $p$ -values - results of Siegel and Castellan's all-pairs comparisons post-hoc test with closed method based on Simes tests (non-negative) to adjust $p$ -values |                                      |                    |          |            |         |
| Length, $L/L_{max}$                                                                                                                                              | 0.8                                  | 0.85               | 0.9      | 0.95       | 1.0     |
| 0.8                                                                                                                                                              | 1                                    | 4.0E-01            | 2.6E-02  | 8.6E-03    | 5.9E-04 |
| 0.85                                                                                                                                                             | 4.0E-01                              | 1                  | 1.7E-01  | 7.2E-02    | 8.6E-03 |
| 0.9                                                                                                                                                              | 2.6E-02                              | 1.7E-01            | 1        | 6.5E-01    | 2.1E-01 |
| 0.95                                                                                                                                                             | 8.6E-03                              | 7.2E-02            | 6.5E-01  | 1          | 3.9E-01 |
| 1.0                                                                                                                                                              | 5.9E-04                              | 8.6E-03            | 2.1E-01  | 3.9E-01    | 1       |

*p* < 0.05 are highlighted in red.

**Table S3. T50 RV (Figure 4B)**

| ANOVA Friedman results                                                                                                                                           |                                      |                    |          |            |         |
|------------------------------------------------------------------------------------------------------------------------------------------------------------------|--------------------------------------|--------------------|----------|------------|---------|
| factor                                                                                                                                                           | Kendall's coefficient of concordance | degrees of freedom | $\chi^2$ | $p$ -value |         |
| Length, $L/L_{max}$                                                                                                                                              | 0.6398                               | 4                  | 28.1517  | 1.2E-05    |         |
| $p$ -values - results of Siegel and Castellan's all-pairs comparisons post-hoc test with closed method based on Simes tests (non-negative) to adjust $p$ -values |                                      |                    |          |            |         |
| Length, $L/L_{max}$                                                                                                                                              | 0.8                                  | 0.85               | 0.9      | 0.95       | 1.0     |
| 0.8                                                                                                                                                              | 1                                    | 2.5E-01            | 5.2E-02  | 6.4E-03    | 1.2E-05 |
| 0.85                                                                                                                                                             | 2.5E-01                              | 1                  | 3.8E-01  | 1.1E-01    | 1.8E-03 |
| 0.9                                                                                                                                                              | 5.2E-02                              | 3.8E-01            | 1        | 3.8E-01    | 2.1E-02 |
| 0.95                                                                                                                                                             | 6.4E-03                              | 1.1E-01            | 3.8E-01  | 1.         | 1.1E-01 |
| 1.0                                                                                                                                                              | 1.2E-05                              | 1.8E-03            | 2.1E-02  | 1.1E-01    | 1       |

*p* < 0.05 are highlighted in red.

**Table S4. T50 RA (Figure 4B)**

| ANOVA Friedman results                                                                                                                                           |                                            |                       |         |          |            |
|------------------------------------------------------------------------------------------------------------------------------------------------------------------|--------------------------------------------|-----------------------|---------|----------|------------|
| factor                                                                                                                                                           | Kendall's<br>coefficient of<br>concordance | degrees of<br>freedom |         | $\chi^2$ | $p$ -value |
| Length, $L/L_{max}$                                                                                                                                              | 1                                          | 4                     |         | 24       | 8.0E-05    |
| $p$ -values - results of Siegel and Castellan's all-pairs comparisons post-hoc test with closed method based on Simes tests (non-negative) to adjust $p$ -values |                                            |                       |         |          |            |
| Length, $L/L_{max}$                                                                                                                                              | 0.8                                        | 0.85                  | 0.9     | 0.95     | 1.0        |
| 0.8                                                                                                                                                              | 1                                          | 2.7E-01               | 4.7E-02 | 3.4E-03  | 1.2E-04    |
| 0.85                                                                                                                                                             | 2.7E-01                                    | 1                     | 2.7E-01 | 4.7E-02  | 3.4E-03    |
| 0.9                                                                                                                                                              | 4.7E-02                                    | 2.7E-01               | 1       | 2.7E-01  | 4.7E-02    |
| 0.95                                                                                                                                                             | 3.4E-03                                    | 4.7E-02               | 2.7E-01 | 1        | 2.7E-01    |
| 1.0                                                                                                                                                              | 1.2E-04                                    | 3.4E-03               | 4.7E-02 | 2.7E-01  | 1          |

*p* < 0.05 are highlighted in red.

**Table S5. Normalised values of maximal rates of tension development RV (Figure 4C)**

| ANOVA Friedman results                                                                                                                                           |                                            |                       |          |            |         |
|------------------------------------------------------------------------------------------------------------------------------------------------------------------|--------------------------------------------|-----------------------|----------|------------|---------|
| factor                                                                                                                                                           | Kendall's<br>coefficient of<br>concordance | degrees of<br>freedom | $\chi^2$ | $p$ -value |         |
| Length, $L/L_{max}$                                                                                                                                              | 0.7174                                     | 4                     | 31.5636  | 2.3E-06    |         |
| $p$ -values - results of Siegel and Castellan's all-pairs comparisons post-hoc test with closed method based on Simes tests (non-negative) to adjust $p$ -values |                                            |                       |          |            |         |
| Length, $L/L_{max}$                                                                                                                                              | 0.8                                        | 0.85                  | 0.9      | 0.95       | 1.0     |
| 0.8                                                                                                                                                              | 1                                          | 3.1E-01               | 6.0E-03  | 2.6E-04    | 2.4E-05 |
| 0.85                                                                                                                                                             | 3.1E-01                                    | 1                     | 9.8E-02  | 6.0E-03    | 9.1E-04 |
| 0.9                                                                                                                                                              | 6.0E-03                                    | 9.8E-02               | 1        | 3.1E-01    | 1.1E-01 |
| 0.95                                                                                                                                                             | 2.6E-04                                    | 6.0E-03               | 3.1E-01  | 1          | 5.0E-01 |
| 1.0                                                                                                                                                              | 2.4E-05                                    | 9.1E-04               | 1.1E-01  | 5.0E-01    | 1       |

*p* < 0.05 are highlighted in red.

**Table S6. Normalised values of maximal rates of tension development RA (Figure 4C)**

| ANOVA Friedman results                                                                                                                                           |                                      |                    |         |          |            |
|------------------------------------------------------------------------------------------------------------------------------------------------------------------|--------------------------------------|--------------------|---------|----------|------------|
| factor                                                                                                                                                           | Kendall's coefficient of concordance | degrees of freedom |         | $\chi^2$ | $p$ -value |
| Length, $L/L_{max}$                                                                                                                                              | 0.9722                               | 4                  |         | 23.3333  | 1.1E-04    |
| $p$ -values - results of Siegel and Castellan's all-pairs comparisons post-hoc test with closed method based on Simes tests (non-negative) to adjust $p$ -values |                                      |                    |         |          |            |
| Length, $L/L_{max}$                                                                                                                                              | 0.8                                  | 0.85               | 0.9     | 0.95     | 1.0        |
| 0.8                                                                                                                                                              | 1                                    | 3.0E-01            | 4.4E-02 | 6.4E-03  | 1.2E-04    |
| 0.85                                                                                                                                                             | 3.0E-01                              | 1                  | 2.5E-01 | 7.4E-02  | 5.1E-03    |
| 0.9                                                                                                                                                              | 4.4E-02                              | 2.5E-01            | 1       | 4.7E-01  | 7.4E-02    |
| 0.95                                                                                                                                                             | 6.4E-03                              | 7.4E-02            | 4.7E-01 | 1        | 2.5E-01    |
| 1.0                                                                                                                                                              | 1.2E-04                              | 5.1E-03            | 7.4E-02 | 2.5E-01  | 1          |

*p* < 0.05 are highlighted in red.

**Table S7.** Normalised values of maximal rates of tension relaxation RV (**Figure 4D**)

| ANOVA Friedman results                                                                                                                                           |                                      |         |                    |          |            |
|------------------------------------------------------------------------------------------------------------------------------------------------------------------|--------------------------------------|---------|--------------------|----------|------------|
| factor                                                                                                                                                           | Kendall's coefficient of concordance |         | degrees of freedom | $\chi^2$ | $p$ -value |
| Length, $L/L_{max}$                                                                                                                                              | 0.8017                               |         | 4                  | 35.2727  | 4.1E-07    |
| $p$ -values - results of Siegel and Castellan's all-pairs comparisons post-hoc test with closed method based on Simes tests (non-negative) to adjust $p$ -values |                                      |         |                    |          |            |
| Length, $L/L_{max}$                                                                                                                                              | 0.8                                  | 0.85    | 0.9                | 0.95     | 1.0        |
| 0.8                                                                                                                                                              | 1                                    | 3.8E-01 | 1.0E-01            | 1.1E-03  | 1.5E-06    |
| 0.85                                                                                                                                                             | 3.8E-01                              | 1       | 4.2E-01            | 2.1E-02  | 8.0E-05    |
| 0.9                                                                                                                                                              | 1.0E-01                              | 4.2E-01 | 1                  | 1.0E-01  | 1.1E-03    |
| 0.95                                                                                                                                                             | 1.1E-03                              | 2.1E-02 | 1.0E-01            | 1        | 1.0E-01    |
| 1.0                                                                                                                                                              | 1.5E-06                              | 8.0E-05 | 1.1E-03            | 1.0E-01  | 1          |

*p* < 0.05 are highlighted in red.

**Table S8.** Normalised values of maximal rates of tension relaxation RA (**Figure 4D**)

| ANOVA Friedman results                                                                                                                                              |                                            |                       |         |          |            |
|---------------------------------------------------------------------------------------------------------------------------------------------------------------------|--------------------------------------------|-----------------------|---------|----------|------------|
| factor                                                                                                                                                              | Kendall's<br>coefficient of<br>concordance | degrees of<br>freedom |         | $\chi^2$ | $p$ -value |
| Length, $L/L_{max}$                                                                                                                                                 | 1                                          | 4                     |         | 24       | 8.0E-05    |
| $p$ -values - results of Siegel and Castellan's all-pairs comparisons post-hoc test with closed method based on<br>Simes tests (non-negative) to adjust $p$ -values |                                            |                       |         |          |            |
| 0.8                                                                                                                                                                 | 1                                          | 2.7E-01               | 4.7E-02 | 3.4E-03  | 1.2E-04    |
| 0.85                                                                                                                                                                | 2.7E-01                                    | 1                     | 2.7E-01 | 4.7E-02  | 3.4E-03    |
| 0.9                                                                                                                                                                 | 4.7E-02                                    | 2.7E-01               | 1       | 2.7E-01  | 4.7E-02    |
| 0.95                                                                                                                                                                | 3.4E-03                                    | 4.7E-02               | 2.7E-01 | 1        | 2.7E-01    |
| 1.0                                                                                                                                                                 | 1.2E-04                                    | 3.4E-03               | 4.7E-02 | 2.7E-01  | 1          |
| 0.8                                                                                                                                                                 | 1                                          | 2.7E-01               | 4.7E-02 | 3.4E-03  | 1.2E-04    |

*p* < 0.05 are highlighted in red.

**Table S9.** APD90 RV (**Figure 5B**)

| ANOVA Friedman results |                                      |                    |          |                 |
|------------------------|--------------------------------------|--------------------|----------|-----------------|
| factor                 | Kendall's coefficient of concordance | degrees of freedom | $\chi^2$ | <i>p</i> -value |
| Length, $L/L_{max}$    | 0.0477                               | 4                  | 2.4839   | 0.65            |

**Table S10.** APD90 RA (**Figure 5B**)

| ANOVA Friedman results |                                      |                    |          |                 |
|------------------------|--------------------------------------|--------------------|----------|-----------------|
| factor                 | Kendall's coefficient of concordance | degrees of freedom | $\chi^2$ | <i>p</i> -value |
| Length, $L/L_{max}$    | 0.1139                               | 4                  | 5.4679   | 0.24            |

**Table S11. T70Ca RV (Figure 6B)**

| ANOVA Friedman results                                                                                                                                           |                                            |                       |          |            |         |
|------------------------------------------------------------------------------------------------------------------------------------------------------------------|--------------------------------------------|-----------------------|----------|------------|---------|
| factor                                                                                                                                                           | Kendall's<br>coefficient of<br>concordance | degrees of<br>freedom | $\chi^2$ | $p$ -value |         |
| Length, $L/L_{max}$                                                                                                                                              | 0.2564                                     | 4                     | 11.2811  | 2.4E-02    |         |
| $p$ -values - results of Siegel and Castellan's all-pairs comparisons post-hoc test with closed method based on Simes tests (non-negative) to adjust $p$ -values |                                            |                       |          |            |         |
| Length, $L/L_{max}$                                                                                                                                              | 0.8                                        | 0.85                  | 0.9      | 0.95       | 1.0     |
| 0.8                                                                                                                                                              | 1                                          | 8.9E-01               | 8.6E-02  | 8.6E-02    | 8.6E-02 |
| 0.85                                                                                                                                                             | 8.9E-01                                    | 1                     | 9.8E-02  | 8.6E-02    | 8.6E-02 |
| 0.9                                                                                                                                                              | 8.6E-02                                    | 9.8E-02               | 1        | 8.9E-01    | 8.9E-01 |
| 0.95                                                                                                                                                             | 8.6E-02                                    | 8.6E-02               | 8.9E-01  | 1          | 8.9E-01 |
| 1.0                                                                                                                                                              | 8.6E-02                                    | 8.6E-02               | 8.9E-01  | 8.9E-01    | 1       |

*p* < 0.05 are highlighted in red.

**Table S12. T70Ca RA (Figure 6B)**

| ANOVA Friedman results                                                                                                                                           |                                      |         |                    |         |          |            |         |
|------------------------------------------------------------------------------------------------------------------------------------------------------------------|--------------------------------------|---------|--------------------|---------|----------|------------|---------|
| factor                                                                                                                                                           | Kendall's coefficient of concordance |         | degrees of freedom |         | $\chi^2$ | $p$ -value |         |
| Length, $L/L_{max}$                                                                                                                                              | 0.6918                               |         | 6                  |         | 24.9036  | 3.6E-04    |         |
| $p$ -values - results of Siegel and Castellan's all-pairs comparisons post-hoc test with closed method based on Simes tests (non-negative) to adjust $p$ -values |                                      |         |                    |         |          |            |         |
| Length, $L/L_{max}$                                                                                                                                              | 0.7                                  | 0.75    | 0.8                | 0.85    | 0.9      | 0.95       | 1.0     |
| 0.7                                                                                                                                                              | 1                                    | 7.8E-01 | 3.7E-01            | 1.9E-01 | 1.7E-02  | 2.2E-02    | 9.4E-03 |
| 0.75                                                                                                                                                             | 7.8E-01                              | 1       | 2.6E-01            | 1.4E-01 | 9.4E-03  | 1.1E-02    | 6.5E-03 |
| 0.8                                                                                                                                                              | 3.7E-01                              | 2.6E-01 | 1                  | 6.9E-01 | 1.7E-01  | 1.8E-01    | 8.2E-02 |
| 0.85                                                                                                                                                             | 1.9E-01                              | 1.4E-01 | 6.9E-01            | 1       | 3.1E-01  | 3.6E-01    | 1.8E-01 |
| 0.9                                                                                                                                                              | 1.7E-02                              | 9.4E-03 | 1.7E-01            | 3.1E-01 | 1        | 8.9E-01    | 7.6E-01 |
| 0.95                                                                                                                                                             | 2.2E-02                              | 1.1E-02 | 1.8E-01            | 3.6E-01 | 8.9E-01  | 1          | 6.9E-01 |
| 1.0                                                                                                                                                              | 9.4E-03                              | 6.5E-03 | 8.2E-02            | 1.8E-01 | 7.6E-01  | 6.9E-01    | 1       |

*p* < 0.05 are highlighted in red.

**Table S13. Amplitude of the difference curve in the III phase of the "CaT difference curve" RV (Figure 7C)**

| ANOVA Friedman results                                                                                                                                                     |                                      |                    |          |                 |
|----------------------------------------------------------------------------------------------------------------------------------------------------------------------------|--------------------------------------|--------------------|----------|-----------------|
| factor                                                                                                                                                                     | Kendall's coefficient of concordance | degrees of freedom | $\chi^2$ | <i>p</i> -value |
| Length, $L/L_{max}$                                                                                                                                                        | 0.32                                 | 3                  | 9.6      | 2.2E-02         |
| <i>p</i> -values - results of Siegel and Castellan's all-pairs comparisons post-hoc test with closed method based on Simes tests (non-negative) to adjust <i>p</i> -values |                                      |                    |          |                 |
| Length, $L/L_{max}$                                                                                                                                                        | 0.85                                 | 0.9                | 0.95     | 1.0             |
| 0.85                                                                                                                                                                       | 1                                    | 5.9E-01            | 8.4E-02  | 2.6E-02         |
| 0.9                                                                                                                                                                        | 5.9E-01                              | 1                  | 2.1E-01  | 6.2E-02         |
| 0.95                                                                                                                                                                       | 8.4E-02                              | 2.1E-01            | 1        | 4.9E-01         |
| 1.0                                                                                                                                                                        | 2.6E-02                              | 6.2E-02            | 4.9E-01  | 1               |

*p* < 0.05 are highlighted in red.

**Table S14.** Amplitude of the difference curve in the III phase of the “CaT difference curve” RA (Figure 7C)

| ANOVA Friedman results                                                                                                                                                     |                                      |                    |          |                 |
|----------------------------------------------------------------------------------------------------------------------------------------------------------------------------|--------------------------------------|--------------------|----------|-----------------|
| factor                                                                                                                                                                     | Kendall's coefficient of concordance | degrees of freedom | $\chi^2$ | <i>p</i> -value |
| Length, $L/L_{max}$                                                                                                                                                        | 0.9444                               | 3                  | 17       | 7.07E-04        |
| <i>p</i> -values - results of Siegel and Castellan's all-pairs comparisons post-hoc test with closed method based on Simes tests (non-negative) to adjust <i>p</i> -values |                                      |                    |          |                 |
| Length, $L/L_{max}$                                                                                                                                                        | 0.85                                 | 0.9                | 0.95     | 1.0             |
| 0.85                                                                                                                                                                       | 1                                    | 3.7E-01            | 2.8E-02  | 8.6E-04         |
| 0.9                                                                                                                                                                        | 3.7E-01                              | 1                  | 1.8E-01  | 1.1E-02         |
| 0.95                                                                                                                                                                       | 2.8E-02                              | 1.8E-01            | 1        | 2.2E-01         |
| 1.0                                                                                                                                                                        | 8.6E-04                              | 1.1E-02            | 2.2E-01  | 1               |

*p* < 0.05 are highlighted in red.

**Table S15.** Relative area (in %) calculated under the difference curve in the III phase of the “CaT difference curve” RV (Figure 7D)

| ANOVA Friedman results                                                                                                                                                     |                                      |                    |          |                 |
|----------------------------------------------------------------------------------------------------------------------------------------------------------------------------|--------------------------------------|--------------------|----------|-----------------|
| factor                                                                                                                                                                     | Kendall's coefficient of concordance | degrees of freedom | $\chi^2$ | <i>p</i> -value |
| Length, $L/L_{max}$                                                                                                                                                        | 0.416                                | 3                  | 12.48    | 5.9E-03         |
| <i>p</i> -values - results of Siegel and Castellan's all-pairs comparisons post-hoc test with closed method based on Simes tests (non-negative) to adjust <i>p</i> -values |                                      |                    |          |                 |
| Length, $L/L_{max}$                                                                                                                                                        | 0.85                                 | 0.9                | 0.95     | 1.0             |
| 0.85                                                                                                                                                                       | 1                                    | 2.6E-01            | 7.8E-02  | 2.3E-03         |
| 0.9                                                                                                                                                                        | 2.6E-01                              | 1                  | 4.1E-01  | 6.2E-02         |
| 0.95                                                                                                                                                                       | 7.8E-02                              | 4.1E-01            | 1        | 2.1E-01         |
| 1.0                                                                                                                                                                        | 2.3E-03                              | 6.2E-02            | 2.1E-01  | 1               |

*p* < 0.05 are highlighted in red.

**Table S16.** Relative area (in %) calculated under the difference curve in the III phase of the “CaT difference curve” RA (Figure 7D)

| ANOVA Friedman results                                                                                                                                                     |                                      |                    |          |                 |
|----------------------------------------------------------------------------------------------------------------------------------------------------------------------------|--------------------------------------|--------------------|----------|-----------------|
| factor                                                                                                                                                                     | Kendall's coefficient of concordance | degrees of freedom | $\chi^2$ | <i>p</i> -value |
| Length, $L/L_{max}$                                                                                                                                                        | 0.8778                               | 3                  | 15.8     | 1.2E-03         |
| <i>p</i> -values - results of Siegel and Castellan's all-pairs comparisons post-hoc test with closed method based on Simes tests (non-negative) to adjust <i>p</i> -values |                                      |                    |          |                 |
| Length, $L/L_{max}$                                                                                                                                                        | 0.85                                 | 0.9                | 0.95     | 1.0             |
| 0.85                                                                                                                                                                       | 1                                    | 2.6E-01            | 5.1E-02  | 8.6E-04         |
| 0.9                                                                                                                                                                        | 2.6E-01                              | 1                  | 2.6E-01  | 2.2E-02         |
| 0.95                                                                                                                                                                       | 5.1E-02                              | 2.6E-01            | 1        | 1.8E-01         |
| 1.0                                                                                                                                                                        | 8.6E-04                              | 2.2E-02            | 1.8E-01  | 1               |

*p* < 0.05 are highlighted in red.
